# Supplementary material for: Ligand-Coupled Conformational Changes in a Cyclic Nucleotide-Gated Ion Channel Revealed by Time-Resolved Transition Metal Ion FRET
Source: PubMed Central journal article supplement (PMC11475872; doi:10.1101/2024.04.25.591185), 2024-10-02
Supplement: NIHPP2024.04.25.591185v2-supplement-1.pdf [file NIHPP2024.04.25.591185v2-supplement-1.pdf]

## Supplemental Figures

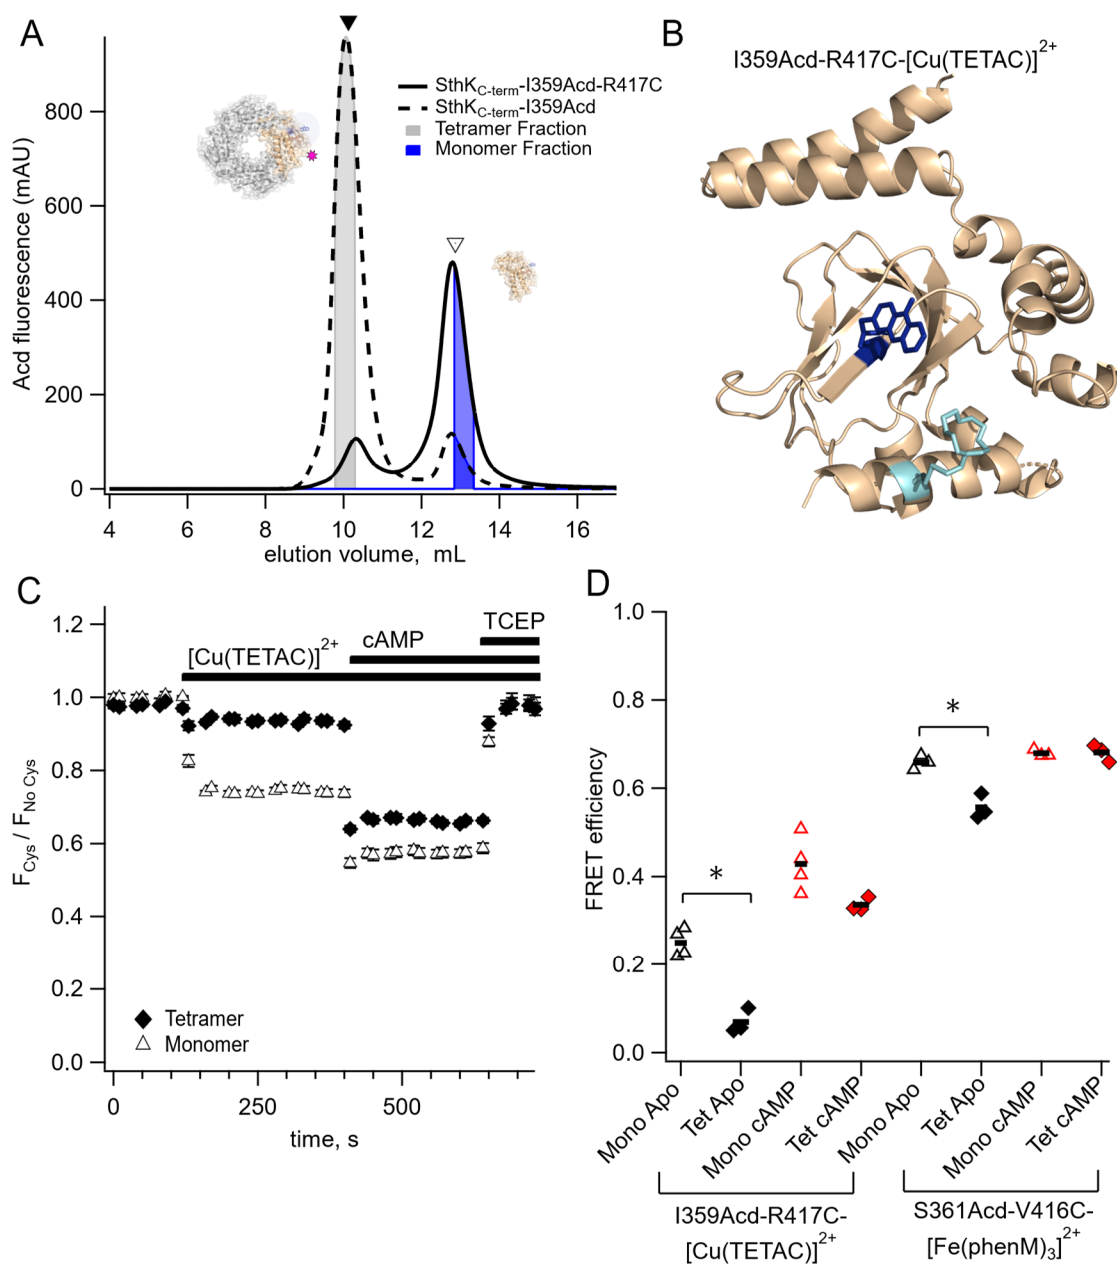

**Fig. S1.** Steady-state tmFRET of monomeric and tetrameric SthK<sub>C-term</sub>. **(A)** SEC chromatogram showing separation of monomeric (empty triangle, blue area) and tetrameric protein (solid triangle, gray area) fractions for SthK<sub>C-term</sub>-I359Acid and SthK<sub>C-term</sub>-I359Acid-R417C (no WT SthK<sub>C-term</sub> present) on a Superdex 75 increase 10/300 column (GE Healthcare). **(B)** Structure showing SthK<sub>C-term</sub>-I359Acid with [Cu(TETAC)]<sup>2+</sup> acceptor at R417C (PDB:4D7T). **(C)** Fluorescence time-course of SthK<sub>C-term</sub>-I359Acid-417C upon addition of [Cu(TETAC)]<sup>2+</sup>, cAMP and TCEP in tetrameric protein (closed diamonds) and monomeric protein (open triangles). **(D)** Summary of FRET efficiencies for monomer and tetramer, with mean values shown as horizontal lines. Left: SthK<sub>C-term</sub>-I359Acid-R417C-[Cu(TETAC)]<sup>2+</sup> (apo, \*P=0.0005, cAMP, P=0.06). Right: SthK<sub>C-term</sub>-S361Acid-V416C-[Fe(phenM)<sub>3</sub>]<sup>2+</sup> apo, \*P=0.006, cAMP: P=0.9).

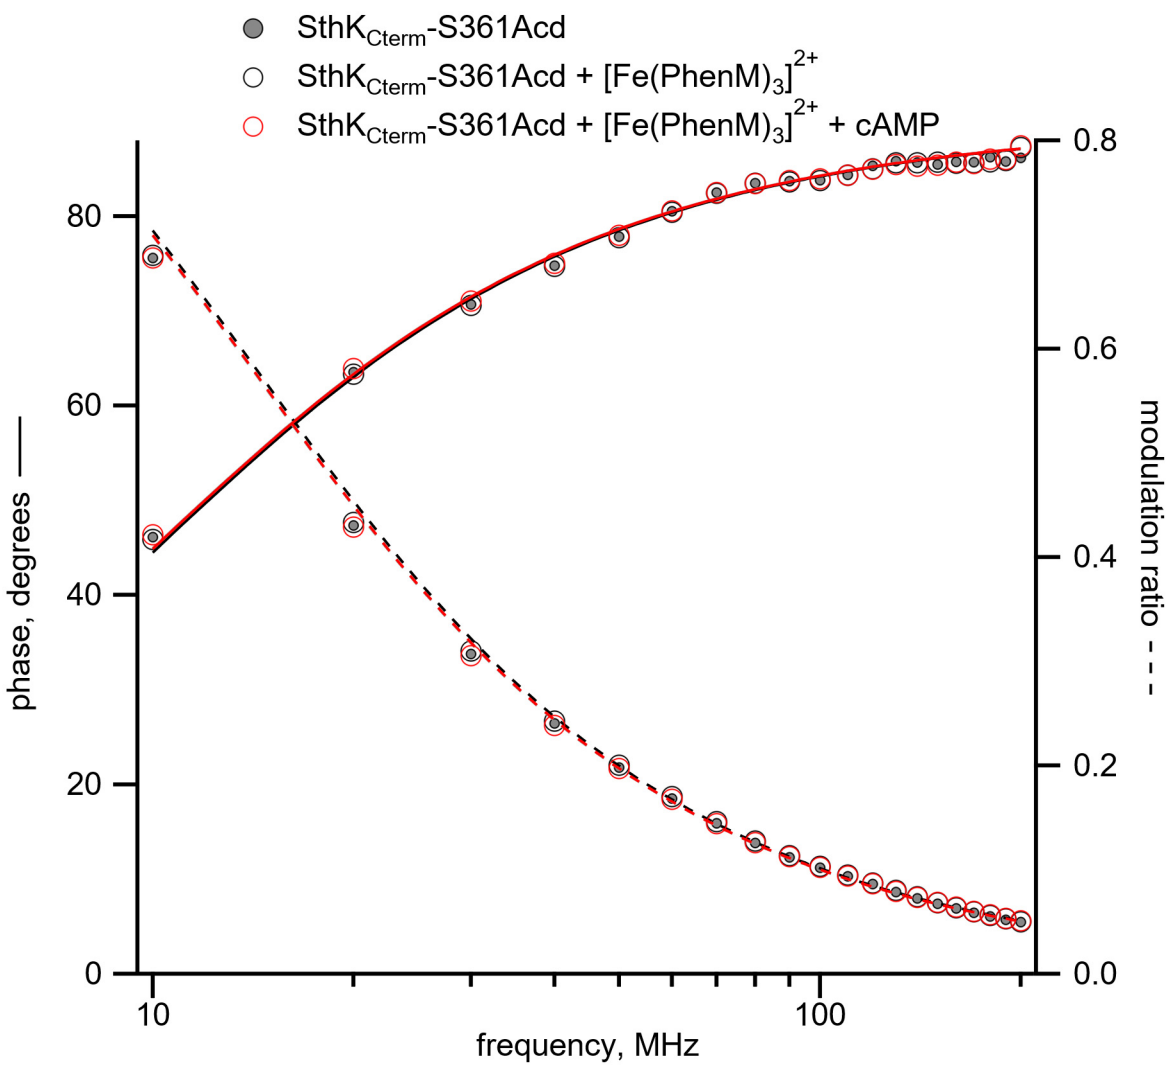

**Fig. S2.** Representative Weber plot of measured lifetimes of SthK<sub>C-term</sub>-S361Acid donor-only (grey), then in the presence of [Fe(phenM)<sub>3</sub>]<sup>2+</sup> (black), and after the addition of 1.23 mM cAMP (red), showing no change in lifetimes in the absence of a cysteine residue.

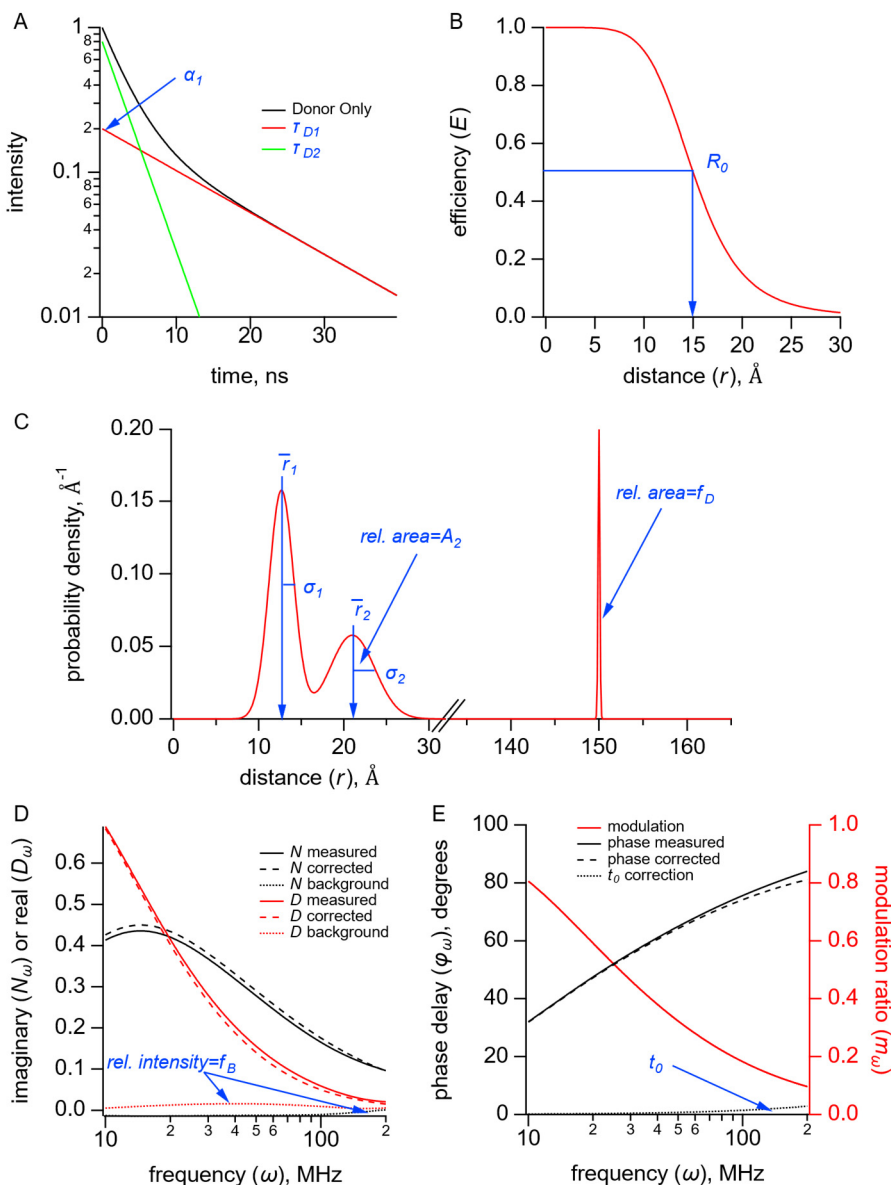

**Fig. S3.** Parameters used in the lifetimes fitting model for both the single and sum of two Gaussian approaches, shown in blue. **(A)** Graph of donor-only fluorescence-lifetime decay with two exponential components with time constants ( $\tau_{D1}$ ,  $\tau_{D2}$ ) **(B)** FRET efficiency ( $E$ ) plot as a function of distance ( $r$ ) between donor and acceptor and the  $R_0$  values for 50% FRET transfer. **(C)** Probability distribution plot of donor and acceptor distances  $P(r)$  showing the sum of two Gaussian distributions, each with their own average distance ( $\bar{r}_1$  and  $\bar{r}_2$ ), standard deviations ( $\sigma_1$  and  $\sigma_2$ ) and relative amplitude of the second component ( $A_2$ ). The donor-only fraction ( $f_D$ ) is modeled as a narrow Gaussian with mean distance of 150 Å and standard deviation of 0.1 Å, beyond a detectable amount of FRET. **(D)** The in-phase ( $D_\omega$ ) and out-of-phase ( $N_\omega$ ) components are plotted for the measured, corrected, and background fluorescence signal as a function of the excitation modulation frequency ( $\omega$ ), where  $f_B$  is the fraction of the fluorescence intensity due to the background. **(E)** Plot of the phase delay ( $\phi_\omega$ ) and modulation ratio ( $m_\omega$ ) of the measured and corrected fluorescence response as a function of the modulation frequency ( $\omega$ ) where  $t_0$  is the time shift of the instrument response function.

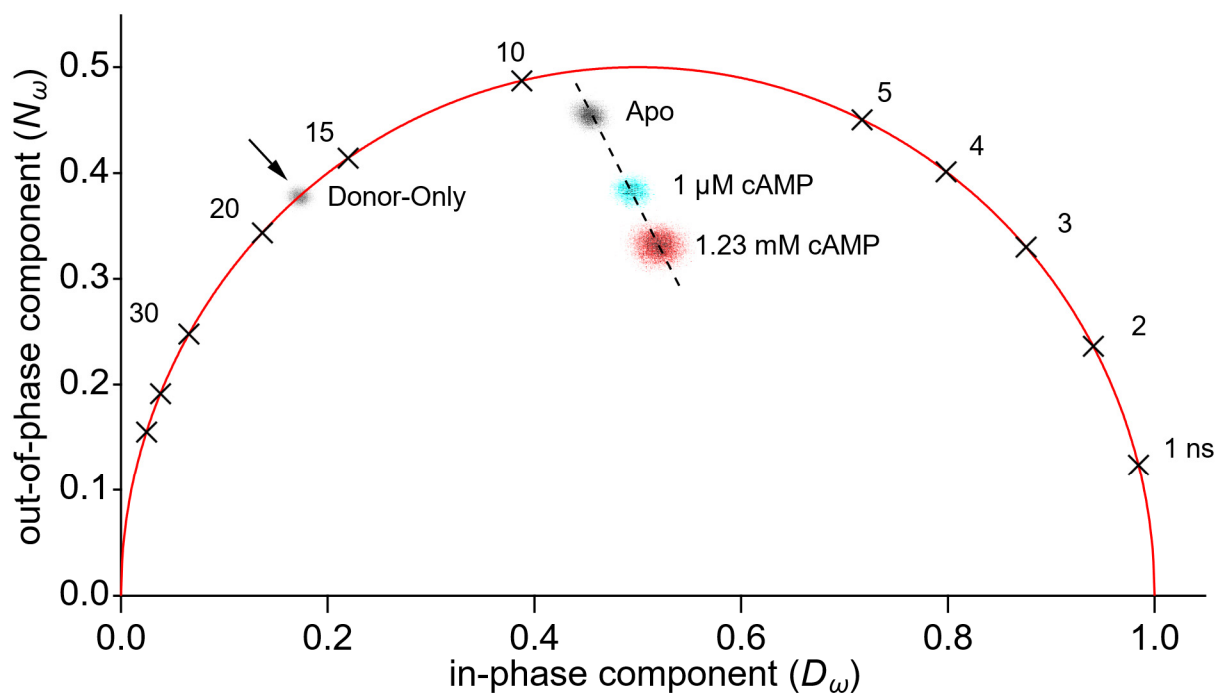

**Fig. S4.** Representative phasor plot of measured lifetimes of SthK<sub>C-term</sub>-S361Acid-V416C alone (donor-only, grey), in the presence of [Ru(bpy)<sub>2</sub>phenM]<sup>2+</sup> (apo, black), in the presence of 1  $\mu$ M cAMP (cyan) and presence of 1.23 mM cAMP (red).

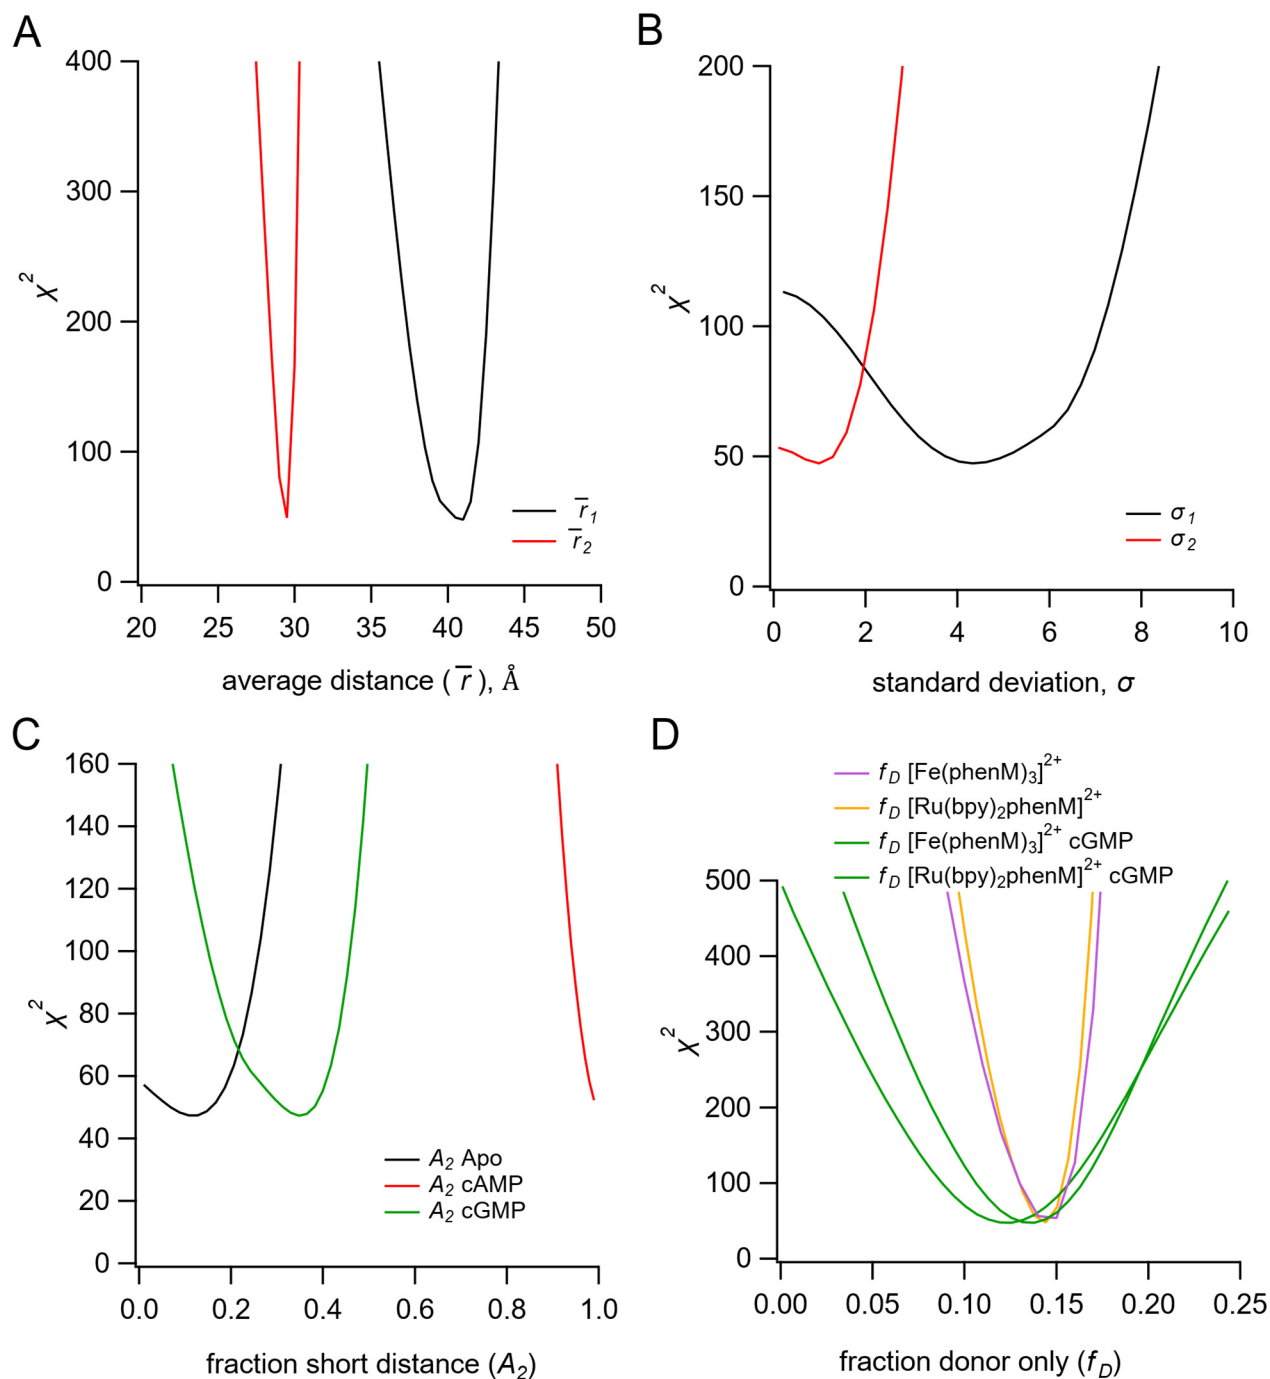

**Fig. S5.** Identifiability of parameters in the sum of two Gaussian distributions model, with global fitting  $\text{Fe}(\text{phenM})_3^{2+}$  and  $[\text{Ru}(\text{bpy})_2\text{phenM}]^{2+}$  data. **(A-B)** Minimization of  $\chi^2$  values for the Gaussian average distance ( $\bar{r}$ ) (A) and standard deviation ( $\sigma$ ) (B) for the resting (black) and active states (red). **(C)** Minimization of  $\chi^2$  values for parameter  $A_2$  for the conditions of apo, cAMP and cGMP. **(D)** Minimization of  $\chi^2$  values for the fraction of donor-only component ( $f_D$ ) in protein samples for each experiment of apo and cAMP for  $[\text{Fe}(\text{phenM})_3]^{2+}$ , of apo and cAMP for  $[\text{Ru}(\text{bpy})_2\text{phenM}]^{2+}$ , of cGMP for  $[\text{Fe}(\text{phenM})_3]^{2+}$ , and of cGMP for  $[\text{Ru}(\text{bpy})_2\text{phenM}]^{2+}$ .
